# Supplementary material for: A Tightly Controlled Conditional Knockdown System Using the Tol2 Transposon-Mediated Technique
Source: PubMed Central journal article supplement (PMC3302819; doi:10.1371/journal.pone.0033380), 2012-03-13
Supplement: pone.0033380.s002.pdf [file pone.0033380.s002.pdf]

**Table S1.** The nomenclature of the vectors and components

|               | <b>Abbreviation</b>      | <b>Full name</b>                                                 | <b>Figure</b>                                 |       |
|---------------|--------------------------|------------------------------------------------------------------|-----------------------------------------------|-------|
| <i>vector</i> | <i>Tol2</i> -transposase | pCAGGS-T2TP                                                      | 1B, 2B, 2C                                    |       |
|               | mir-empty                | pT2K-TBI-shRNAmir                                                | 1C, D, 3B, C                                  |       |
|               | mir-APP#2                | pT2K-TBI-shRNAmir-APP#2                                          | 1C, D                                         |       |
|               | mir-APP#3                | pT2K-TBI-shRNAmir-APP#3                                          | 1C, D                                         |       |
|               | mir-Dab1#2               | pT2K-TBI-shRNAmir-Dab1#2                                         | 3B,C                                          |       |
|               | H1-empty                 | pSUPER-puro-H1-empty                                             | S1B                                           |       |
|               | H1-shAPP#2               | pSUPER-puro-H1-shAPP#2                                           | S1B                                           |       |
|               | U6-empty                 | mU6pro-empty                                                     | S1B                                           |       |
|               | U6-shAPP#2               | mU6pro-shAPP#2                                                   | S1B                                           |       |
|               | CAGGS-mir-empty          | pCAGGS-shRNAmir-empty                                            | S1B                                           |       |
|               | CAGGS-mir-APP#2          | pCAGGS-shRNAmir-APP#2                                            | S1B                                           |       |
|               | CAGGS-mir-APP#3          | pCAGGS-shRNAmir-APP#3                                            | S1B                                           |       |
|               | <i>vector component</i>  | shRNAmir                                                         | mir30-based knockdown cassette                | 1A, B |
|               |                          | TRE-BI                                                           | bidirectional tetracycline-responsive element | 1A    |
| TRE-TBI       |                          | tightly controlled bidirectional tetracycline-responsive element | 1A, B                                         |       |
| <i>Tol2</i>   |                          | <i>Tol2</i> transposable element                                 | 1A, B                                         |       |
| EGFP          |                          | enhanced green fluorescent protein                               | 1A, B                                         |       |
| rtTA-M2       |                          | modified reverse tetracycline-controlled transactivator          | 1B                                            |       |
| <i>others</i> | Dox                      | Doxycycline                                                      | 1C,D,E,F, 2A,B,C, 3A,C                        |       |

'Figure' column indicates figure panels in which abbreviations are appeared.
